# Supplementary material for: N-Terminal Acetylation Inhibits Protein Targeting to the Endoplasmic Reticulum
Source: PubMed Central journal article supplement (PMC3104963; doi:10.1371/journal.pbio.1001073), 2011-05-31
Supplement: pbio.1001073.s006.pdf [file pbio.1001073.s006.pdf]

Table S1 N-terminal sequence and predicted processing of yeast signal sequences

| Protein | N-terminal residues | Predicted Met cleavage | Predicted Acetylation* |
|---------|---------------------|------------------------|------------------------|
| ADP1    | MG                  | Cleaved                | Non-acetylated         |
| AGA1    | MT                  | Cleaved                | Non-acetylated         |
| AGA2    | MQ                  | Uncleaved              | Non-acetylated         |
| AIM6    | MLG                 | Uncleaved              | Non-acetylated         |
| ANS1    | MK                  | Uncleaved              | Non-acetylated         |
| APE3    | MHF                 | Uncleaved              | Non-acetylated         |
| ASP3-1  | MR                  | Uncleaved              | Non-acetylated         |
| ASP3-2  | MR                  | Uncleaved              | Non-acetylated         |
| ASP3-3  | MR                  | Uncleaved              | Non-acetylated         |
| ASP3-4  | MR                  | Uncleaved              | Non-acetylated         |
| ATG15   | MLG                 | Uncleaved              | Non-acetylated         |
| ATG27   | MV                  | Cleaved                | Non-acetylated         |
| ATH1    | MK                  | Uncleaved              | Non-acetylated         |
| AWA1    | MFN                 | Uncleaved              | Acetylated             |
| AXL2    | MT                  | Cleaved                | Non-acetylated         |
| BAR1    | MS                  | Cleaved                | Acetylated             |
| BGL2    | MR                  | Uncleaved              | Non-acetylated         |
| BIG1    | MQ                  | Uncleaved              | Non-acetylated         |
| CCW12   | MQ                  | Uncleaved              | Non-acetylated         |
| CCW14   | MR                  | Uncleaved              | Non-acetylated         |
| CDA1    | MK                  | Uncleaved              | Non-acetylated         |
| CDA2    | MR                  | Uncleaved              | Non-acetylated         |
| CIS3    | MQ                  | Uncleaved              | Non-acetylated         |
| CNE1    | MK                  | Uncleaved              | Non-acetylated         |
| CPR4    | MWL                 | Uncleaved              | Non-acetylated         |
| CPR5    | MK                  | Uncleaved              | Non-acetylated         |
| CRH1    | MK                  | Uncleaved              | Non-acetylated         |
| CRR1    | MR                  | Uncleaved              | Non-acetylated         |
| CSG2    | MS                  | Cleaved                | Acetylated             |
| CTS1    | MS                  | Cleaved                | Acetylated             |
| CTS2    | MV                  | Cleaved                | Non-acetylated         |
| CWH43   | MLI                 | Uncleaved              | Non-acetylated         |
| CWP1    | MK                  | Uncleaved              | Non-acetylated         |
| CWP2    | MQ                  | Uncleaved              | Non-acetylated         |
| CYP2    | MK                  | Uncleaved              | Non-acetylated         |
| DAN1    | MS                  | Cleaved                | Acetylated             |
| DAN2    | MV                  | Cleaved                | Non-acetylated         |
| DAN3    | MV                  | Cleaved                | Non-acetylated         |
| DAN4    | MV                  | Cleaved                | Non-acetylated         |
| DCW1    | MLV                 | Uncleaved              | Non-acetylated         |
| DDR2    | MK                  | Uncleaved              | Non-acetylated         |
| DFG5    | MI                  | Uncleaved              | Non-acetylated         |
| DIA3    | MV                  | Cleaved                | Non-acetylated         |
| DSE2    | MK                  | Uncleaved              | Non-acetylated         |
| DSE4    | MQ                  | Uncleaved              | Non-acetylated         |
| ECM14   | MLH                 | Uncleaved              | Non-acetylated         |
| ECM33   | MQ                  | Uncleaved              | Non-acetylated         |
| EGT2    | MN                  | Uncleaved              | Acetylated *           |

|       |     |           |                |
|-------|-----|-----------|----------------|
| EMC1  | MK  | Uncleaved | Non-acetylated |
| EMP24 | MAS | Cleaved   | Acetylated     |
| EMP46 | MT  | Cleaved   | Non-acetylated |
| EMP47 | MMM | Uncleaved | Non-acetylated |
| EMP70 | MI  | Uncleaved | Non-acetylated |
| EPS1  | MK  | Uncleaved | Non-acetylated |
| ERJ5  | MN  | Uncleaved | Acetylated *   |
| ERO1  | MR  | Uncleaved | Non-acetylated |
| ERP1  | MLL | Uncleaved | Non-acetylated |
| ERP2  | MI  | Uncleaved | Non-acetylated |
| ERP3  | MS  | Cleaved   | Acetylated     |
| ERP4  | MR  | Uncleaved | Non-acetylated |
| ERP5  | MR  | Uncleaved | Non-acetylated |
| ERP6  | MLS | Uncleaved | Non-acetylated |
| ERV25 | MQ  | Uncleaved | Non-acetylated |
| EUG1  | MQ  | Uncleaved | Non-acetylated |
| EXG1  | MLS | Uncleaved | Non-acetylated |
| EXG2  | MP  | Cleaved   | Non-acetylated |
| FET3  | MT  | Cleaved   | Non-acetylated |
| FET5  | MLF | Uncleaved | Non-acetylated |
| FIG2  | MN  | Uncleaved | Acetylated *   |
| FIT1  | MK  | Uncleaved | Non-acetylated |
| FIT2  | MK  | Uncleaved | Non-acetylated |
| FIT3  | MK  | Uncleaved | Non-acetylated |
| FLC1  | MQ  | Uncleaved | Non-acetylated |
| FLC2  | MI  | Uncleaved | Non-acetylated |
| FLC3  | MR  | Uncleaved | Non-acetylated |
| FLO1  | MT  | Cleaved   | Non-acetylated |
| FLO10 | MP  | Cleaved   | Non-acetylated |
| FLO11 | MQ  | Uncleaved | Non-acetylated |
| FLO5  | MT  | Cleaved   | Non-acetylated |
| FLO9  | MS  | Cleaved   | Acetylated     |
| FMN1  | MFT | Uncleaved | Non-acetylated |
| FPR2  | MMF | Uncleaved | Non-acetylated |
| FRE1  | MV  | Cleaved   | Non-acetylated |
| FRE2  | MHW | Uncleaved | Non-acetylated |
| FRE3  | MY  | Uncleaved | Non-acetylated |
| FRE4  | MLL | Uncleaved | Non-acetylated |
| FRE5  | MLF | Uncleaved | Non-acetylated |
| FRE6  | MHR | Uncleaved | Acetylated     |
| GAB1  | MD  | Uncleaved | Acetylated     |
| GAS1  | MLF | Uncleaved | Non-acetylated |
| GAS2  | MN  | Uncleaved | Acetylated *   |
| GAS3  | MQ  | Uncleaved | Non-acetylated |
| GAS4  | MMV | Uncleaved | Non-acetylated |
| GAS5  | MLL | Uncleaved | Non-acetylated |
| GPI16 | MI  | Uncleaved | Non-acetylated |
| GPI17 | MS  | Cleaved   | Acetylated     |
| GPI8  | MR  | Uncleaved | Non-acetylated |
| GRX6  | MI  | Uncleaved | Non-acetylated |
| GTB1  | MV  | Cleaved   | Non-acetylated |
| HKR1  | MV  | Cleaved   | Non-acetylated |
| HOR7  | MK  | Uncleaved | Non-acetylated |

|          |     |           |                |
|----------|-----|-----------|----------------|
| HPF1     | MFN | Uncleaved | Acetylated     |
| HRD3     | MI  | Uncleaved | Non-acetylated |
| HSP150   | MQ  | Uncleaved | Non-acetylated |
| IRC22    | MR  | Uncleaved | Non-acetylated |
| IRE1     | MR  | Uncleaved | Non-acetylated |
| JEM1     | MI  | Uncleaved | Non-acetylated |
| KAR2     | MFF | Uncleaved | Non-acetylated |
| KAR5     | MFE | Uncleaved | Non-acetylated |
| KEX1     | MFY | Uncleaved | Non-acetylated |
| KEX2     | MK  | Uncleaved | Non-acetylated |
| KNH1     | MLI | Uncleaved | Non-acetylated |
| KRE1     | MMR | Uncleaved | Acetylated     |
| KRE27    | MS  | Cleaved   | Acetylated     |
| KRE5     | MR  | Uncleaved | Non-acetylated |
| KRE9     | MR  | Uncleaved | Non-acetylated |
| LHS1     | MR  | Uncleaved | Non-acetylated |
| LRC1     | MLG | Uncleaved | Non-acetylated |
| MEL1     | MFA | Uncleaved | Acetylated     |
| MEL2     | MFA | Uncleaved | Acetylated     |
| MEL5     | MFA | Uncleaved | Acetylated     |
| MEL6     | MFA | Uncleaved | Acetylated     |
| MFALPHA  | MR  | Uncleaved | Non-acetylated |
| MFALPHA2 | MK  | Uncleaved | Non-acetylated |
| MID1     | MI  | Uncleaved | Non-acetylated |
| MID2     | MLS | Uncleaved | Non-acetylated |
| MKC7     | MK  | Uncleaved | Non-acetylated |
| MNL1     | MV  | Cleaved   | Non-acetylated |
| MNN5     | MLI | Uncleaved | Non-acetylated |
| MPD1     | MLF | Uncleaved | Non-acetylated |
| MPD2     | MK  | Uncleaved | Non-acetylated |
| MRL1     | MLK | Uncleaved | Acetylated     |
| MSB2     | MQ  | Uncleaved | Non-acetylated |
| MTL1     | MAS | Cleaved   | Acetylated     |
| MUC1     | MQ  | Uncleaved | Non-acetylated |
| NCP1     | MP  | Cleaved   | Non-acetylated |
| NCR1     | MN  | Uncleaved | Acetylated *   |
| NPC2     | MT  | Cleaved   | Acetylated     |
| NVJ1     | MT  | Cleaved   | Acetylated     |
| OST1     | MR  | Uncleaved | Non-acetylated |
| OST3     | MN  | Uncleaved | Acetylated *   |
| OST6     | MK  | Uncleaved | Non-acetylated |
| PAU10    | MV  | Cleaved   | Non-acetylated |
| PAU13    | MV  | Cleaved   | Non-acetylated |
| PAU15    | MV  | Cleaved   | Non-acetylated |
| PDI1     | MK  | Uncleaved | Non-acetylated |
| PEP1     | MI  | Uncleaved | Non-acetylated |
| PEP4     | MFS | Uncleaved | Non-acetylated |
| PER1     | MR  | Uncleaved | Non-acetylated |
| PGA1     | MV  | Cleaved   | Non-acetylated |
| PGU1     | MI  | Uncleaved | Non-acetylated |
| PHO11    | MLK | Uncleaved | Acetylated     |
| PHO12    | MLK | Uncleaved | Acetylated     |
| PHO3     | MFK | Uncleaved | Acetylated     |

|        |     |           |                |
|--------|-----|-----------|----------------|
| PHO5   | MFK | Uncleaved | Acetylated     |
| PIR1   | MQ  | Uncleaved | Non-acetylated |
| PIR3   | MQ  | Uncleaved | Non-acetylated |
| PLB1   | MK  | Uncleaved | Non-acetylated |
| PLB2   | MQ  | Uncleaved | Non-acetylated |
| PLB3   | MI  | Uncleaved | Non-acetylated |
| PRB1   | MK  | Uncleaved | Non-acetylated |
| PRC1   | MK  | Uncleaved | Non-acetylated |
| PRY1   | MK  | Uncleaved | Non-acetylated |
| PRY2   | MK  | Uncleaved | Non-acetylated |
| PRY3   | MLE | Uncleaved | Non-acetylated |
| PST1   | MQ  | Uncleaved | Non-acetylated |
| PST2   | MP  | Cleaved   | Non-acetylated |
| PTM1   | MR  | Uncleaved | Non-acetylated |
| RAX2   | MFV | Uncleaved | Non-acetylated |
| RNY1   | MLL | Uncleaved | Non-acetylated |
| ROT1   | MWS | Uncleaved | Non-acetylated |
| ROT2   | MV  | Cleaved   | Non-acetylated |
| RRT12  | MK  | Uncleaved | Non-acetylated |
| SAG1   | MFT | Uncleaved | Non-acetylated |
| SCJ1   | MI  | Uncleaved | Non-acetylated |
| SCW10  | MR  | Uncleaved | Non-acetylated |
| SCW11  | MI  | Uncleaved | Non-acetylated |
| SCW4   | MR  | Uncleaved | Non-acetylated |
| SED1   | MK  | Uncleaved | Non-acetylated |
| SHE10  | MG  | Cleaved   | Non-acetylated |
| SIA1   | MR  | Uncleaved | Non-acetylated |
| SIL1   | MV  | Cleaved   | Non-acetylated |
| SIM1   | MK  | Uncleaved | Non-acetylated |
| SLG1   | MR  | Uncleaved | Non-acetylated |
| SLP1   | MAN | Cleaved   | Non-acetylated |
| SOP4   | MFS | Uncleaved | Non-acetylated |
| SPI1   | MLS | Uncleaved | Non-acetylated |
| SPO19  | MK  | Uncleaved | Non-acetylated |
| SPR1   | MV  | Cleaved   | Non-acetylated |
| SPS100 | MK  | Uncleaved | Non-acetylated |
| SPS22  | MN  | Uncleaved | Acetylated *   |
| SRL1   | MLQ | Uncleaved | Non-acetylated |
| SSP120 | MR  | Uncleaved | Non-acetylated |
| STA1   | MV  | Cleaved   | Non-acetylated |
| STA2   | MQ  | Uncleaved | Non-acetylated |
| SUC1   | ML  | Uncleaved | Non-acetylated |
| SUC2   | MLL | Uncleaved | Non-acetylated |
| SUC4   | ML  | Uncleaved | Non-acetylated |
| SUN4   | MK  | Uncleaved | Non-acetylated |
| SVS1   | MI  | Uncleaved | Non-acetylated |
| SWP1   | MQ  | Uncleaved | Non-acetylated |
| TED1   | MLR | Uncleaved | Acetylated     |
| THI22  | MV  | Cleaved   | Non-acetylated |
| TIP1   | MS  | Cleaved   | Acetylated     |
| TIR1   | MAY | Cleaved   | Non-acetylated |
| TIR2   | MAY | Cleaved   | Non-acetylated |
| TIR3   | MS  | Cleaved   | Acetylated     |

|           |     |           |                |
|-----------|-----|-----------|----------------|
| TIR4      | MAY | Cleaved   | Non-acetylated |
| TMN2      | MK  | Uncleaved | Non-acetylated |
| TMN3      | MR  | Uncleaved | Non-acetylated |
| TOS1      | MLQ | Uncleaved | Non-acetylated |
| UIP5      | MS  | Cleaved   | Acetylated     |
| UTR2      | MAI | Cleaved   | Non-acetylated |
| VOA1      | MV  | Cleaved   | Non-acetylated |
| VTH1      | MAL | Cleaved   | Non-acetylated |
| WBP1      | MR  | Uncleaved | Non-acetylated |
| WSC2      | MHL | Uncleaved | Non-acetylated |
| WSC3      | ME  | Uncleaved | Acetylated     |
| WSC4      | MQ  | Uncleaved | Non-acetylated |
| YBL008W-A | MK  | Uncleaved | Non-acetylated |
| YBR013C   | MI  | Uncleaved | Non-acetylated |
| YBR200W-A | MLL | Uncleaved | Non-acetylated |
| YCL012C   | MK  | Uncleaved | Non-acetylated |
| YCL048W-A | MQ  | Uncleaved | Non-acetylated |
| YCL049C   | MFS | Uncleaved | Non-acetylated |
| YCR012C   | MK  | Uncleaved | Non-acetylated |
| YDR053W   | MR  | Uncleaved | Non-acetylated |
| YDR134C   | MQ  | Uncleaved | Non-acetylated |
| YDR246W-A | MR  | Uncleaved | Non-acetylated |
| YDR262W   | MI  | Uncleaved | Non-acetylated |
| YDR366C   | MV  | Cleaved   | Non-acetylated |
| YDR415C   | MR  | Uncleaved | Non-acetylated |
| YDR524C-B | MQ  | Uncleaved | Non-acetylated |
| YER067W   | MT  | Cleaved   | Non-acetylated |
| YFL051C   | MS  | Cleaved   | Acetylated     |
| YFR012W-A | MLP | Uncleaved | Non-acetylated |
| YGP1      | MK  | Uncleaved | Non-acetylated |
| YGR079W   | MS  | Cleaved   | Acetylated     |
| YHC3      | MS  | Cleaved   | Acetylated     |
| YHL017W   | MD  | Uncleaved | Acetylated     |
| YHL042W   | MK  | Uncleaved | Non-acetylated |
| YHR138C   | MK  | Uncleaved | Non-acetylated |
| YHR214W   | MFN | Uncleaved | Acetylated     |
| YIL156W-B | MT  | Cleaved   | Non-acetylated |
| YIL169C   | MFN | Uncleaved | Acetylated     |
| YJL052C   | MHL | Uncleaved | Non-acetylated |
| YJL160c   | MHY | Uncleaved | Non-acetylated |
| YJL171C   | MLQ | Uncleaved | Non-acetylated |
| YJR120W   | MR  | Uncleaved | Non-acetylated |
| YKL018C-A | MLG | Uncleaved | Non-acetylated |
| YLR001C   | MN  | Uncleaved | Acetylated *   |
| YLR040c   | MI  | Uncleaved | Non-acetylated |
| YLR042C   | MK  | Uncleaved | Non-acetylated |
| YLR104W   | MS  | Cleaved   | Acetylated     |
| YLR194C   | MK  | Uncleaved | Non-acetylated |
| YLR406C-A | MI  | Uncleaved | Non-acetylated |
| YLR413W   | MN  | Uncleaved | Acetylated *   |
| YLR414C   | MR  | Uncleaved | Non-acetylated |
| YMR247W-A | MAH | Cleaved   | Non-acetylated |
| YMR272W-B | MR  | Uncleaved | Non-acetylated |

|           |     |           |                |
|-----------|-----|-----------|----------------|
| YMR315W-A | MT  | Cleaved   | Non-Acetylated |
| YNL019C   | MLY | Uncleaved | Non-acetylated |
| YNL024C-A | MS  | Cleaved   | Acetylated     |
| YNL033W   | MLY | Uncleaved | Non-acetylated |
| YNL217W   | ME  | Uncleaved | Acetylated     |
| YOR008C-A | MWR | Uncleaved | Acetylated     |
| YOR214C   | MLG | Uncleaved | Non-acetylated |
| YOR365C   | MLP | Uncleaved | Non-acetylated |
| YOR389W   | MR  | Uncleaved | Non-acetylated |
| YOS9      | MQ  | Uncleaved | Non-acetylated |
| YPS1      | MK  | Uncleaved | Non-acetylated |
| YPS3      | MK  | Uncleaved | Non-acetylated |
| YPS5      | MQ  | Uncleaved | Non-acetylated |
| YPS6      | MQ  | Uncleaved | Non-acetylated |
| YPS7      | MT  | Cleaved   | Non-acetylated |
| YSP3      | MK  | Uncleaved | Non-acetylated |
| ZPS1      | MK  | Uncleaved | Non-acetylated |

\* MN acetylation is predicted in only 55% of cases
