# Supplementary material for: N-Terminal Acetylation Inhibits Protein Targeting to the Endoplasmic Reticulum
Source: PubMed Central journal article supplement (PMC3104963; doi:10.1371/journal.pbio.1001073), 2011-05-31
Supplement: pbio.1001073.s007.pdf [file pbio.1001073.s007.pdf]

Table S2 N-terminal sequence and predicted processing of yeast cytosolic proteins

| Protein | N-terminal residues | Predicted Met cleavage | Predicted Acetylation* |
|---------|---------------------|------------------------|------------------------|
| AAT2    | MS                  | cleaved                | Acetylated             |
| ABZ2    | MS                  | cleaved                | Acetylated             |
| ACS2    | MT                  | cleaved                | non-acetylated         |
| ACT1    | MD                  | uncleaved              | Acetylated             |
| ADE1    | MS                  | cleaved                | Acetylated             |
| ADE2    | MD                  | uncleaved              | Acetylated             |
| ADE3    | MAG                 | cleaved                | non-acetylated         |
| ADK1    | MS                  | cleaved                | Acetylated             |
| ALD6    | MT                  | cleaved                | non-acetylated         |
| ALD6    | MT                  | cleaved                | non-acetylated         |
| ANB1    | MS                  | cleaved                | Acetylated             |
| APL3    | MD                  | uncleaved              | Acetylated             |
| APL6    | MV                  | cleaved                | non-acetylated         |
| APS3    | MI                  | uncleaved              | non-acetylated         |
| ARD1    | MP                  | cleaved                | non-acetylated         |
| ARF1    | MG                  | cleaved                | non-acetylated         |
| ARG4    | MS                  | cleaved                | Acetylated             |
| ARK1    | MN                  | uncleaved              | Acetylated *           |
| ARP14   | MS                  | cleaved                | Acetylated             |
| ARP2    | MD                  | uncleaved              | Acetylated             |
| ASC1    | MAS                 | cleaved                | Acetylated             |
| ASP1    | MK                  | uncleaved              | non-acetylated         |
| ATG1    | MG                  | cleaved                | non-acetylated         |
| ATG11   | MAD                 | cleaved                | non-acetylated         |
| ATS1    | MS                  | cleaved                | Acetylated             |
| ATX1    | MAE                 | cleaved                | Acetylated             |
| AVO2    | MLK                 | uncleaved              | Acetylated             |
| BAT2    | MT                  | cleaved                | non-acetylated         |
| BAT2    | MT                  | cleaved                | non-acetylated         |
| BCY1    | MV                  | cleaved                | non-acetylated         |
| BEM1    | MLK                 | uncleaved              | Acetylated             |
| BIM1    | MS                  | cleaved                | Acetylated             |
| BMH1    | MS                  | cleaved                | Acetylated             |
| BMH2    | MS                  | cleaved                | Acetylated             |
| BNI1    | MLK                 | uncleaved              | Acetylated             |
| BTS1    | ME                  | uncleaved              | Acetylated             |
| BTT1    | MP                  | cleaved                | non-acetylated         |
| CCR4    | MN                  | uncleaved              | Acetylated *           |
| CCT3    | MQ                  | uncleaved              | non-acetylated         |
| CCT4    | MS                  | cleaved                | Acetylated             |
| CCT6    | MS                  | cleaved                | Acetylated             |
| CCT7    | MN                  | uncleaved              | Acetylated *           |
| CDC14   | MR                  | uncleaved              | non-acetylated         |
| CDC19   | MS                  | cleaved                | Acetylated             |
| CDC42   | MQ                  | uncleaved              | non-acetylated         |
| CDC48   | MG                  | cleaved                | non-acetylated         |
| CDC60   | MS                  | cleaved                | Acetylated             |
| CDC8    | MMG                 | uncleaved              | non-acetylated         |
| CIA1    | MAS                 | cleaved                | Acetylated             |

|       |     |           |                |
|-------|-----|-----------|----------------|
| CKA2  | MP  | cleaved   | non-acetylated |
| CKB2  | MG  | cleaved   | non-acetylated |
| CLA4  | MS  | cleaved   | Acetylated     |
| CMD1  | MS  | cleaved   | Acetylated     |
| CMK1  | MD  | uncleaved | Acetylated     |
| CPR1  | MS  | cleaved   | Acetylated     |
| CSL4  | MAC | cleaved   | non-acetylated |
| CYS3  | MT  | cleaved   | non-acetylated |
| DCC1  | MS  | cleaved   | Acetylated     |
| DCP2  | MS  | cleaved   | Acetylated     |
| DDP1  | MG  | cleaved   | non-acetylated |
| DED81 | MS  | cleaved   | Acetylated     |
| DIA2  | MS  | cleaved   | Acetylated     |
| DOA1  | MG  | cleaved   | non-acetylated |
| DOG2  | MP  | cleaved   | non-acetylated |
| DYS1  | MS  | cleaved   | Acetylated     |
| DYS1  | MS  | cleaved   | Acetylated     |
| EBS1  | ME  | uncleaved | Acetylated     |
| EDE1  | MAS | cleaved   | Acetylated     |
| EFB1  | MAS | cleaved   | Acetylated     |
| EGD1  | MP  | cleaved   | non-acetylated |
| EGD2  | MS  | cleaved   | Acetylated     |
| ERG10 | MS  | cleaved   | Acetylated     |
| ERG8  | MS  | cleaved   | Acetylated     |
| EXO70 | MP  | cleaved   | non-acetylated |
| EXO84 | MV  | cleaved   | non-acetylated |
| FAB1  | MS  | cleaved   | Acetylated     |
| FAS1  | MD  | uncleaved | Acetylated     |
| FAS2  | MK  | uncleaved | non-acetylated |
| FBA1  | MG  | cleaved   | non-acetylated |
| FES1  | ME  | uncleaved | Acetylated     |
| FOL2  | MHN | uncleaved | Acetylated     |
| FPR1  | MS  | cleaved   | Acetylated     |
| FRS1  | MP  | cleaved   | non-acetylated |
| FUN11 | MS  | cleaved   | Acetylated     |
| GAL1  | MT  | cleaved   | non-acetylated |
| GAL10 | MT  | cleaved   | non-acetylated |
| GCD11 | MS  | cleaved   | Acetylated     |
| GCN2  | MS  | cleaved   | Acetylated     |
| GET3  | MD  | uncleaved | Acetylated     |
| GGA2  | MS  | cleaved   | Acetylated     |
| GIM3  | ME  | uncleaved | Acetylated     |
| GIM4  | ME  | uncleaved | Acetylated     |
| GLK1  | MS  | cleaved   | Acetylated     |
| GTO3  | MS  | cleaved   | Acetylated     |
| GUA1  | MAA | cleaved   | non-acetylated |
| GUS1  | MP  | cleaved   | non-acetylated |
| HAC1  | ME  | uncleaved | Acetylated     |
| HCH1  | MV  | cleaved   | non-acetylated |
| HEK2  | MS  | cleaved   | Acetylated     |
| HIS3  | MT  | cleaved   | non-acetylated |
| HIS4  | MV  | cleaved   | non-acetylated |
| HOM2  | MAG | cleaved   | non-acetylated |

|        |     |           |                |
|--------|-----|-----------|----------------|
| HOM3   | MP  | cleaved   | non-acetylated |
| HOM6   | MS  | cleaved   | Acetylated     |
| HTS1   | MLS | uncleaved | non-acetylated |
| HUL5   | MLN | uncleaved | Acetylated     |
| HXK1   | MV  | cleaved   | non-acetylated |
| HXK2   | MV  | cleaved   | non-acetylated |
| HYP2   | MS  | cleaved   | Acetylated     |
| IDP2   | MT  | cleaved   | non-acetylated |
| ILS1   | MS  | cleaved   | Acetylated     |
| IPP1   | MT  | cleaved   | non-acetylated |
| IRA2   | MS  | cleaved   | Acetylated     |
| JSN1   | MD  | uncleaved | Acetylated     |
| KAP104 | MAS | cleaved   | Acetylated     |
| KAR3   | ME  | uncleaved | Acetylated     |
| KCS1   | MD  | uncleaved | Acetylated     |
| KIN2   | MP  | cleaved   | non-acetylated |
| KIP1   | MAR | cleaved   | non-acetylated |
| KSP1   | MT  | cleaved   | non-acetylated |
| LEU2   | MS  | cleaved   | Acetylated     |
| LIA1   | MS  | cleaved   | Acetylated     |
| LIA1   | MS  | cleaved   | Acetylated     |
| LSM1   | MS  | cleaved   | Acetylated     |
| LSM2   | MLF | uncleaved | non-acetylated |
| LTP1   | MT  | cleaved   | non-acetylated |
| LYS2   | MT  | cleaved   | non-acetylated |
| LYS5   | MV  | cleaved   | non-acetylated |
| LYS9   | MG  | cleaved   | non-acetylated |
| MAP1   | MS  | cleaved   | Acetylated     |
| MAP2   | MT  | cleaved   | non-acetylated |
| MCM2   | MS  | cleaved   | Acetylated     |
| MDY2   | MS  | cleaved   | Acetylated     |
| MES1   | MS  | cleaved   | Acetylated     |
| MET1   | MV  | cleaved   | non-acetylated |
| MET14  | MAT | cleaved   | non-acetylated |
| MET6   | MV  | cleaved   | non-acetylated |
| MET8   | MV  | cleaved   | non-acetylated |
| MIH1   | MN  | uncleaved | Acetylated *   |
| MON2   | MAM | cleaved   | non-acetylated |
| MOT2   | MMN | uncleaved | Acetylated     |
| MUQ1   | MT  | cleaved   | non-acetylated |
| MYO2   | MS  | cleaved   | Acetylated     |
| MYO4   | MS  | cleaved   | Acetylated     |
| NAR1   | MS  | cleaved   | Acetylated     |
| NCS2   | ME  | uncleaved | Acetylated     |
| NMD3   | ME  | uncleaved | Acetylated     |
| NPL4   | MLI | uncleaved | non-acetylated |
| NRK1   | MT  | cleaved   | non-acetylated |
| OPI3   | MK  | uncleaved | non-acetylated |
| PAB1   | MAD | cleaved   | non-acetylated |
| PAC10  | MD  | uncleaved | Acetylated     |
| PAN1   | MY  | uncleaved | non-acetylated |
| PCK1   | MS  | cleaved   | Acetylated     |
| PCT1   | MAN | cleaved   | non-acetylated |

|        |     |           |                |
|--------|-----|-----------|----------------|
| PFD1   | MS  | cleaved   | Acetylated     |
| PFK1   | MQ  | uncleaved | non-acetylated |
| PFK27  | MG  | cleaved   | non-acetylated |
| PFY1   | MS  | cleaved   | Acetylated     |
| PGI1   | MS  | cleaved   | Acetylated     |
| PIG2   | MAT | cleaved   | non-acetylated |
| PKC1   | MS  | cleaved   | Acetylated     |
| PPG1   | ME  | uncleaved | Acetylated     |
| PPQ1   | MR  | uncleaved | non-acetylated |
| PPT1   | MS  | cleaved   | Acetylated     |
| PPZ1   | MG  | cleaved   | non-acetylated |
| PRE2   | MQ  | uncleaved | non-acetylated |
| PRE6   | MS  | cleaved   | Acetylated     |
| PRR1   | MD  | uncleaved | Acetylated     |
| PRS1   | MR  | uncleaved | non-acetylated |
| PTC1   | MS  | cleaved   | Acetylated     |
| PTP3   | MK  | uncleaved | non-acetylated |
| PUF2   | MD  | uncleaved | Acetylated     |
| PYC1   | MS  | cleaved   | Acetylated     |
| PYC2   | MS  | cleaved   | Acetylated     |
| RAD6   | MS  | cleaved   | Acetylated     |
| RAS1   | MQ  | uncleaved | non-acetylated |
| RBL2   | MAP | cleaved   | non-acetylated |
| RFA1   | MS  | cleaved   | Acetylated     |
| RGA1   | MAS | cleaved   | Acetylated     |
| RIM13  | MN  | uncleaved | Acetylated *   |
| RNR4   | ME  | uncleaved | Acetylated     |
| RPL17A | MAR | cleaved   | non-acetylated |
| RPL19B | MAN | cleaved   | non-acetylated |
| RPL23A | MS  | cleaved   | Acetylated     |
| RPL39  | MAA | cleaved   | non-acetylated |
| RPL4A  | MS  | cleaved   | Acetylated     |
| RPN1   | MV  | cleaved   | non-acetylated |
| RPN2   | MS  | cleaved   | Acetylated     |
| RPS3   | MV  | cleaved   | non-acetylated |
| RPS6A  | MK  | uncleaved | non-acetylated |
| RPS7B  | MS  | cleaved   | Acetylated     |
| RPS8A  | MG  | cleaved   | non-acetylated |
| RTG3   | MMN | uncleaved | Acetylated     |
| RVS161 | MS  | cleaved   | Acetylated     |
| RVS167 | MS  | cleaved   | Acetylated     |
| SAC6   | MN  | uncleaved | Acetylated *   |
| SAC7   | MP  | cleaved   | non-acetylated |
| SAR1   | MAG | cleaved   | non-acetylated |
| SCP160 | MS  | cleaved   | Acetylated     |
| SEC13  | MV  | cleaved   | non-acetylated |
| SEC31  | MV  | cleaved   | non-acetylated |
| SER1   | MS  | cleaved   | Acetylated     |
| SER2   | MS  | cleaved   | Acetylated     |
| SES1   | MLD | uncleaved | non-acetylated |
| SHE2   | MS  | cleaved   | Acetylated     |
| SHE3   | MS  | cleaved   | Acetylated     |
| SHM2   | MP  | cleaved   | non-acetylated |

|         |     |           |                |
|---------|-----|-----------|----------------|
| SIC1    | MT  | cleaved   | non-acetylated |
| SIT4    | MV  | cleaved   | non-acetylated |
| SIW14   | MG  | cleaved   | non-acetylated |
| SIZ1    | MI  | uncleaved | non-acetylated |
| SKO1    | MS  | cleaved   | Acetylated     |
| SLA1    | MT  | cleaved   | non-acetylated |
| SMY1    | MHW | uncleaved | non-acetylated |
| SRP1    | MD  | uncleaved | Acetylated     |
| SRP101  | MFD | uncleaved | non-acetylated |
| SRP14   | MAN | cleaved   | non-acetylated |
| SRP54   | MV  | cleaved   | non-acetylated |
| SSA1    | MS  | cleaved   | Acetylated     |
| SSB1    | MAE | cleaved   | Acetylated     |
| STI1    | MS  | cleaved   | Acetylated     |
| STU1    | MS  | cleaved   | Acetylated     |
| SUI2    | MS  | cleaved   | Acetylated     |
| SUP35   | MS  | cleaved   | Acetylated     |
| SUP45   | MD  | uncleaved | Acetylated     |
| SYN8    | MD  | uncleaved | Acetylated     |
| TEF1    | MG  | cleaved   | non-acetylated |
| TEF2    | MG  | cleaved   | non-acetylated |
| TIF1    | MS  | cleaved   | Acetylated     |
| TMA46   | MP  | cleaved   | non-acetylated |
| TMT1    | MS  | cleaved   | Acetylated     |
| TPD3    | MS  | cleaved   | Acetylated     |
| TPM1    | MD  | uncleaved | Acetylated     |
| TRP1    | MS  | cleaved   | Acetylated     |
| TSA1    | MV  | cleaved   | non-acetylated |
| TUB1    | MR  | uncleaved | non-acetylated |
| TUB2    | MR  | uncleaved | non-acetylated |
| UBA1    | MS  | cleaved   | Acetylated     |
| UBP6    | MS  | cleaved   | Acetylated     |
| UFD1    | MFS | uncleaved | non-acetylated |
| URA3    | MS  | cleaved   | Acetylated     |
| URA7    | MK  | uncleaved | non-acetylated |
| URA8    | MK  | uncleaved | non-acetylated |
| UTR1    | MK  | uncleaved | non-acetylated |
| VID30   | MS  | cleaved   | Acetylated     |
| VPS1    | MD  | uncleaved | Acetylated     |
| YMR099c | MP  | cleaved   | non-acetylated |
| YVH1    | MAG | cleaved   | non-acetylated |
| ZUO1    | MFS | uncleaved | non-acetylated |
| ZWF1    | MS  | cleaved   | Acetylated     |

\* MN acetylation is predicted in only 55% of cases
