# Supplementary material for: N-Terminal Acetylation Inhibits Protein Targeting to the Endoplasmic Reticulum
Source: PubMed Central journal article supplement (PMC3104963; doi:10.1371/journal.pbio.1001073), 2011-05-31
Supplement: pbio.1001073.s009.pdf [file pbio.1001073.s009.pdf]

Table S4: Predicted Relative Frequency of N-terminal methionine cleavage

|           | Signal Sequence | Cytosol |
|-----------|-----------------|---------|
| cleaved   | 23.1            | 71.8    |
| uncleaved | 76.9            | 28.2    |
