# Supplementary material for: N-Terminal Acetylation Inhibits Protein Targeting to the Endoplasmic Reticulum
Source: PubMed Central journal article supplement (PMC3104963; doi:10.1371/journal.pbio.1001073), 2011-05-31
Supplement: pbio.1001073.s010.pdf [file pbio.1001073.s010.pdf]

Table S5 Relative P2 Frequency of Signal Sequences from different Organisms

| P2 residue | Human | C. elegans | S. cerevisiae | D.melanogaster | A.thaliana |
|------------|-------|------------|---------------|----------------|------------|
| A          | 18.99 | 1.59       | 2.94          | 7.81           | 25.00      |
| C          | 0.34  | 1.85       | 0.00          | 0.89           | 0.40       |
| D          | 1.85  | 1.06       | 1.10          | 1.34           | 3.57       |
| E          | 5.04  | 1.32       | 1.10          | 2.23           | 7.74       |
| F          | 2.02  | 4.23       | 6.62          | 6.47           | 0.79       |
| G          | 9.41  | 2.12       | 0.74          | 4.02           | 8.33       |
| H          | 1.01  | 2.65       | 2.21          | 2.01           | 0.40       |
| I          | 3.03  | 7.41       | 6.62          | 2.46           | 1.39       |
| K          | 9.92  | 12.96      | 16.18         | 18.08          | 18.45      |
| L          | 8.07  | 7.94       | 11.40         | 8.48           | 3.17       |
| M          | 1.51  | 2.38       | 1.84          | 3.57           | 2.78       |
| N          | 1.68  | 8.47       | 4.78          | 6.70           | 2.98       |
| P          | 2.86  | 2.65       | 1.10          | 3.57           | 0.79       |
| Q          | 3.70  | 4.23       | 11.76         | 4.91           | 0.99       |
| R          | 13.28 | 23.54      | 13.24         | 10.04          | 6.15       |
| S          | 5.21  | 5.82       | 5.51          | 7.14           | 8.53       |
| T          | 2.69  | 5.56       | 4.04          | 3.57           | 4.37       |
| V          | 6.05  | 1.85       | 7.72          | 2.46           | 3.57       |
| W          | 2.18  | 1.32       | 0.74          | 2.01           | 0.20       |
| Y          | 1.18  | 1.06       | 0.37          | 2.23           | 0.40       |
| n          | 595   | 378        | 277           | 448            | 500        |
