# Supplementary material for: N-Terminal Acetylation Inhibits Protein Targeting to the Endoplasmic Reticulum
Source: PubMed Central journal article supplement (PMC3104963; doi:10.1371/journal.pbio.1001073), 2011-05-31
Supplement: pbio.1001073.s011.pdf [file pbio.1001073.s011.pdf]

Table S6 Predicted Frequency of N-terminal processing of Signal Sequences from different organisms

| Organism               | Predicted N-terminal Processing |             |                        |                          | n   |
|------------------------|---------------------------------|-------------|------------------------|--------------------------|-----|
|                        | Unprocessed                     | Met-cleaved | Uncleaved & acetylated | Met-cleaved & acetylated |     |
| <i>S. cerevisiae</i>   | 66                              | 16          | 11                     | 7                        | 277 |
| <i>C. elegans</i>      | 68                              | 15          | 11                     | 6                        | 378 |
| <i>D. melanogaster</i> | 60                              | 17          | 10                     | 13                       | 448 |
| Human                  | 46                              | 23          | 23                     | 8                        | 595 |
| <i>A. thaliana</i>     | 34                              | 24          | 14                     | 28                       | 500 |
