# Supplementary material for: N-Terminal Acetylation Inhibits Protein Targeting to the Endoplasmic Reticulum
Source: PubMed Central journal article supplement (PMC3104963; doi:10.1371/journal.pbio.1001073), 2011-05-31
Supplement: pbio.1001073.s012.pdf [file pbio.1001073.s012.pdf]

**Table S7 Yeast strains used in this study**

| <b>Name</b>   | <b>Genotype</b>                                                                                                                         | <b>Reference</b> |
|---------------|-----------------------------------------------------------------------------------------------------------------------------------------|------------------|
| MWY63         | <i>Mata prc1::KanMX leu2 his3 ura3 ade2 pep4-3 sec61-3</i>                                                                              | [1]              |
| $\Delta prc1$ | <i>Mata prc1::KanMX4 his3<math>\Delta</math>1 leu2<math>\Delta</math>0 lys2<math>\Delta</math>0 ura3<math>\Delta</math>0</i>            | [2]              |
| $\Delta pep4$ | <i>Mata pep4::KanMX4 his3<math>\Delta</math>1 leu2<math>\Delta</math>0 met15<math>\Delta</math>0 ura3<math>\Delta</math>0</i>           | [2]              |
| GFY3          | <i>Mata prc1::KanMX4 pep4:: KanMX4 his3<math>\Delta</math>1 leu2<math>\Delta</math>0 ura3<math>\Delta</math>0</i>                       | This study       |
| GFY7          | <i>Mata prc1::KanMX4 pep4:: KanMX4 map1::HIS3MX6 his3<math>\Delta</math>1 leu2<math>\Delta</math>0 ura3<math>\Delta</math>0</i>         | This study       |
| GFY11         | <i>Mata prc1::KanMX4 ard1::hph his3<math>\Delta</math>1 leu2<math>\Delta</math>0 lys2<math>\Delta</math>0 ura3<math>\Delta</math>0</i>  | This study       |
| GFY12         | <i>Mata prc1::KanMX4 nat3:: hph his3<math>\Delta</math>1 leu2<math>\Delta</math>0 lys2<math>\Delta</math>0 ura3<math>\Delta</math>0</i> | This study       |

#### References

[1] Willer M, Forte GM, Stirling CJ (2008) Sec61p is required for ERAD-L: genetic dissection of the translocation and ERAD-L functions of Sec61p using novel derivatives of CPY. *J Biol Chem.* 283: 33883-33888.

[2] Winzeler EA, Shoemaker DD, Astromoff A, Liang H, Anderson K, et al. (1999) Functional characterization of the *S. cerevisiae* genome by gene deletion and parallel analysis. *Science* 285: 901-906.
