# Supplementary material for: N-Terminal Acetylation Inhibits Protein Targeting to the Endoplasmic Reticulum
Source: PubMed Central journal article supplement (PMC3104963; doi:10.1371/journal.pbio.1001073), 2011-05-31
Supplement: pbio.1001073.s013.pdf [file pbio.1001073.s013.pdf]

**Table S8 Oligonucleotides used in this study**

| Name                   | Sequence                                                                                            | Description                           |
|------------------------|-----------------------------------------------------------------------------------------------------|---------------------------------------|
| Map1 KO F              | TCCTAGCAAGAAAAAATAAGCAAAAAATGTATAATCGGATCCCGGGTTAATTAA                                              | <i>HIS3MX6</i> disruption <i>MAP1</i> |
| Map1 KO R              | GTACAAGTTCAAGTTTTTATTGGTTTCTATATGTATAAGATAAGAATTCGAGCTCGTTAAAC                                      | <i>HIS3MX6</i> disrupt <i>MAP1</i>    |
| Ard1/A KO F2           | AAATACATACGATCAAGCTCCAAAATAAACTTCGTCAACCCGGATCCCGGGTTAATTAA                                         | Hph disruption <i>ARD1</i>            |
| Ard1/A KO R            | CCTGGATGAAAATATACTACGTTTATATAGGTTGATTTAAAATACGACTCACTATAGGGAG                                       | Hph disruption <i>ARD1</i>            |
| Nat3/B KO F2           | ATTGAGAATATTCAAGGAAAGAGACAGGAGGATTGAGAACGGATCCCGGGTTAATTAA                                          | Hph disruption <i>NAT3</i>            |
| Nat3/B KO R            | ATTATTATGTTCTGAGTATGAGGACGAGGTAATACATACCAATACGACTCACTATAGGGAG                                       | Hph disruption <i>NAT3</i>            |
| CPY-A-F                | CAACTTAAAGTATACATACGCTATGGCTAAAGCATTACCAGTTTACTATG                                                  | SDM of pMW346                         |
| CPY-A-R                | CATAGTAAACTGGTGAATGCTTTAGCCATAGCGTATGTATACTTTAAGTTG                                                 | "                                     |
| CPY-C-F                | CAACTTAAAGTATACATACGCTATGTGTAAGCATTACCAGTTTACTATG                                                   | "                                     |
| CPY-C-R                | CATAGTAAACTGGTGAATGCTTTACACATAGCGTATGTATACTTTAAGTTG                                                 | "                                     |
| CPY-E-F                | CAACTTAAAGTATACATACGCTATGAAAAAGCATTACCAGTTTACTATG                                                   | "                                     |
| CPY-E-R                | CATAGTAAACTGGTGAATGCTTTTTCCATAGCGTATGTATACTTTAAGTTG                                                 | "                                     |
| CPY-G-F                | CAACTTAAAGTATACATACGCTATGGGTAAGCATTACCAGTTTACTATG                                                   | "                                     |
| CPY-G-R                | CATAGTAAACTGGTGAATGCTTTACCCATAGCGTATGTATACTTTAAGTTG                                                 | "                                     |
| CPY-R-F                | CAACTTAAAGTATACATACGCTATGAGAAAAGCATTACCAGTTTACTATG                                                  | "                                     |
| CPY-R-R                | CATAGTAAACTGGTGAATGCTTTTCTCATAGCGTATGTATACTTTAAGTTG                                                 | "                                     |
| CPY-S-F                | CAACTTAAAGTATACATACGCTATGTCCAAAGCATTACCAGTTTACTATG                                                  | "                                     |
| CPY-S-R                | CATAGTAAACTGGTGAATGCTTTGGACATAGCGTATGTATACTTTAAGTTG                                                 | "                                     |
| CPY-V-F                | CAACTTAAAGTATACATACGCTATGGTCAAAGCATTACCAGTTTACTATG                                                  | "                                     |
| CPY-V-R                | CATAGTAAACTGGTGAATGCTTTGACCATAGCGTATGTATACTTTAAGTTG                                                 | "                                     |
| OPY-A-F                | GGTGCTGAAAAAATGGCTAGGCAGGTTTGGTTC                                                                   | SDM of pOPY                           |
| OPY-A-R                | GAACCAAACCTGCCTAGCCATTTTTTCAGCACC                                                                   | "                                     |
| OPY-C-F                | GGTGCTGAAAAAATGTGTAGGCAGGTTTGGTTC                                                                   | "                                     |
| OPY-C-R                | GAACCAAACCTGCCTACACATTTTTTCAGCACC                                                                   | "                                     |
| OPY-E-F                | GGTGCTGAAAAAATGAAAGGCAGGTTTGGTTC                                                                    | "                                     |
| OPY-E-R                | GAACCAAACCTGCCTTTCCATTTTTTCAGCACC                                                                   | "                                     |
| OPY-G-F                | GGTGCTGAAAAAATGGGTAGGCAGGTTTGGTTC                                                                   | "                                     |
| OPY-G-R                | GAACCAAACCTGCCTACCCATTTTTTCAGCACC                                                                   | "                                     |
| OPY-S-F                | TTGGTGCTGAAAAAATGTCTAGGCAGGTTTGGTTCCTTGG                                                            | "                                     |
| OPY-S-R                | CCAAGAGAACCAAACCTGCCTAGACATTTTTTCAGCACAA                                                            | "                                     |
| PDI-F                  | ACTTAAAGTTATAACATACGCTATGAAGTTTTCTGCTGGTGCCGTC                                                      | Myc-tagging PDI1                      |
| PDI-S-F                | ACTTAAAGTTATAACATACGCTATGTCTAAGTTTTCTGCTGGTGCCGTC                                                   | SDM of pPDI1-myc                      |
| PDI-E-F                | ACTTAAAGTTATAACATACGCTATGGAGAAGTTTTCTGCTGGTGCCGTC                                                   | "                                     |
| PDI-myc-R              | ACCACCGTGGATCCATTCTACAAATCTTTCAGAAATCAATTTTTGTTCCAATTCATCGTGAA<br>TGGCATC                           | Myc-tagging PDI1                      |
| PP $\alpha$ -F         | CAACTTAAAGTATACATACGCTATGAGATTTCTTCAAT                                                              | Myc-tagging pp $\alpha$ F             |
| PP $\alpha$ -S-F       | CAACTTAAAGTATACATACGCTATGTCTAGATTTCTTCAAT                                                           | SDM of ppAF-2myc                      |
| PP $\alpha$ -2myc-R    | ACCACCGTGGATCCATTCTACAAATCTTTCAGAAATCAATTTTTGTTCCAGGTCCTCTCG<br>CTGATCAGCTTCTGCTCGTACATTGGTTGGCCGGG | Myc-tagging pp $\alpha$ F             |
| pp $\alpha$ F wt sp6 F | ATTTAGGTGACACTATAGACGATTAAGAATGAGATTTTC                                                             | MR mRNA template                      |
| pp $\alpha$ F S sp6 F  | ATTTAGGTGACACTATAGACGATTAAGAATGTCAGATTTCTTCAAT                                                      | MSR mRNA template                     |
| pp $\alpha$ F msrr F   | ATTTAGGTGACACTATAGACGATTAAGAATGTCAGAAGATTTCTTCAAT                                                   | MSRR mRNA template                    |
| pEH3 R                 | GCCTGCAGGTGACTCTAGAGTCG                                                                             | pEH3 mRNA template                    |
| ppalpha k5 R           | GCATGCCTGCAGGTGACTTTGTTAC                                                                           | pGF22 mRNA template                   |
| Ost1 ss EcoRI-f        | GCAAGCTGAATTCCTTCTTTGACAAGTACCCGATTGC                                                               | PCR OST1 signal sequence              |

---

|                  |                                                             |                          |
|------------------|-------------------------------------------------------------|--------------------------|
| Ost1 ss HincII-r | GGACAGGATGTTGACCGGCTCGTATTGGGCAGCAG                         | PCR OST1 signal sequence |
| DHC sp6 wt F     | ATTTAGGTGACACTATAGAAGAGGATCCGGATCCATGAGAG                   | MR mRNA template         |
| DHC sp6 S F      | ATTTAGGTGACACTATAGAAGAGGATCCGGATCCATGTCAAGAGTCGGTATTATCTTCG | MSR mRNA template        |

---
