# Supplementary material for: N-Terminal Acetylation Inhibits Protein Targeting to the Endoplasmic Reticulum
Source: PubMed Central journal article supplement (PMC3104963; doi:10.1371/journal.pbio.1001073), 2011-05-31
Supplement: pbio.1001073.s014.pdf [file pbio.1001073.s014.pdf]

**Table S9 Plasmids used in this study**

| <b>Name</b>           | <b>Description</b>                                                                                                                                                   | <b>Source</b> |
|-----------------------|----------------------------------------------------------------------------------------------------------------------------------------------------------------------|---------------|
| pMW346                | ppCPY <i>LEU2</i> pRS315                                                                                                                                             | [1]           |
| pCPY-A                | SDM of pMW346 Alanine inserted at position 2 of signal sequence                                                                                                      | This study    |
| pCPY-C                | SDM of pMW346 Cysteine inserted at position 2 of signal sequence                                                                                                     | This study    |
| pCPY-E                | SDM of pMW346 Glutamate inserted at position 2 of signal sequence                                                                                                    | This study    |
| pCPY-G                | SDM of pMW346 Glycine inserted at position 2 of signal sequence                                                                                                      | This study    |
| pCPY-R                | SDM of pMW346 Arginine inserted at position 2 of signal sequence                                                                                                     | This study    |
| pCPY-S                | SDM of pMW346 Serine inserted at position 2 of signal sequence                                                                                                       | This study    |
| pCPY-V                | SDM of pMW346 Valine inserted at position 2 of signal sequence                                                                                                       | This study    |
| pOPY                  | pMW346 modified so that Ost1 signal sequence replaced that of CPY                                                                                                    | This study    |
| pOPY-A                | SDM of pOPY Alanine inserted at position 2 of signal sequence                                                                                                        | This study    |
| pOPY-C                | SDM of pOPY Cysteine inserted at position 2 of signal sequence                                                                                                       | This study    |
| pOPY-E                | SDM of pOPY Glutamate inserted at position 2 of signal sequence                                                                                                      | This study    |
| pOPY-G                | SDM of pOPY Glycine inserted at position 2 of signal sequence                                                                                                        | This study    |
| pOPY-S                | SDM of pOPY Serine inserted at position 2 of signal sequence                                                                                                         | This study    |
| pPDI-myc              | pMW346 with CPY ORF replaced with C-terminal myc-tagged <i>PDI1</i>                                                                                                  | This study    |
| pPDI-myc-S            | pMW346 with CPY ORF replaced with C-terminal myc-tagged <i>PDI1</i> -MS mutant                                                                                       | This study    |
| pPDI-myc-E            | pMW346 with CPY ORF replaced with C-terminal myc-tagged <i>PDI1</i> -ME mutant                                                                                       | This study    |
| pPP $\alpha$ F-2myc   | pMW346 with CPY ORF replaced with C-terminal 2xmyc-tagged pp $\alpha$ F                                                                                              | This study    |
| pPP $\alpha$ F-2myc-S | pMW346 with CPY ORF replaced with C-terminal 2xmyc-tagged pp $\alpha$ F ME mutant                                                                                    | This study    |
| pA11-K5K14            | K5 pp $\alpha$ F in pAlter, all lysines codons in <i>wild-type</i> pp $\alpha$ F altered to arginine and lysines introduced at positions 5 and 14 of signal sequence | [2]           |
| pEH3                  | pGEM3-pp $\alpha$ F                                                                                                                                                  | [3]           |
| pGF22                 | pGEM3-pp $\alpha$ F with all lysines codons in <i>wild-type</i> pp $\alpha$ F altered to arginine                                                                    | This study    |
| pGF23                 | pGF22 cut Sall klenow filled and relegated to remove one HincII site                                                                                                 | This study    |
| pGF24                 | O- $\alpha$ Factor pGF22 signal sequence of pp $\alpha$ F replaced with that of OST1                                                                                 | This study    |
| pGF25                 | As pGF24 except for insertion of serine at position 2 of OST1 signal sequence                                                                                        | This study    |
| pGF28                 | As for pGF22 but with the signal sequence replaced by that of D <sub>HC</sub> from pJD96                                                                             | This study    |
| pJD96                 | p-D <sub>HC</sub> $\alpha$ F (codon-bias optimised)                                                                                                                  | [4]           |

## References

[1] Willer M, Forte GM, Stirling CJ (2008) Sec61p is required for ERAD-L: genetic dissection of the translocation and ERAD-L functions of Sec61p using novel derivatives of CPY. *J Biol Chem.* 283: 33883-33888.

[2] Plath K, Mothes W, Wilkinson BM, Stirling CJ, Rapoport TA (1998) Signal sequence recognition in posttranslational protein transport across the yeast ER membrane. *Cell* 94: 795-807.

[3] Steel GJ, Brownsword J, Stirling CJ (2002) Tail-Anchored Protein Insertion into Yeast ER requires Novel a Posttranslational Mechanism Which is Independent of the SEC Machinery. *Biochemistry* 41: 11914-11920.

[4] Mason N, Ciuffo LF, Brown JD (2000) Elongation arrest is a physiologically important function of the signal recognition particle. *EMBO J.* 19: 4164-4174.
