# Supplementary material for: N-Terminal Acetylation Inhibits Protein Targeting to the Endoplasmic Reticulum
Source: PLoS Biol. 2011 May 31;9(5):e1001073. doi: 10.1371/journal.pbio.1001073 (PMC3104963; doi:10.1371/journal.pbio.1001073)
Supplement: Table S3 — Relative amino acid frequency at position 2 by compartment in yeast. (PDF) [file pbio.1001073.s008.pdf]

Table S3: Relative Amino Acid Frequency at Position 2 by Compartment in Yeast

| P2 Residue | Signal Sequence | Cytosol | f(ss)/f(cyt) |
|------------|-----------------|---------|--------------|
| A          | 3.25            | 10.32   | 0.317        |
| C          | 0.00            | 0.00    | $\infty$     |
| D          | 0.72            | 6.75    | 0.108        |
| E          | 0.72            | 4.37    | 0.167        |
| F          | 6.50            | 1.19    | 4.887        |
| G          | 0.72            | 5.56    | 0.131        |
| H          | 2.17            | 0.79    | 2.749        |
| I          | 6.86            | 0.79    | 8.705        |
| K          | 16.61           | 3.17    | 5.269        |
| L          | 13.72           | 3.17    | 4.353        |
| M          | 1.44            | 1.19    | 1.222        |
| N          | 3.61            | 2.38    | 1.527        |
| P          | 1.44            | 5.56    | 0.262        |
| Q          | 10.11           | 1.98    | 5.132        |
| R          | 13.00           | 1.98    | 6.598        |
| S          | 5.78            | 35.32   | 0.165        |
| T          | 4.33            | 7.54    | 0.579        |
| V          | 7.58            | 7.54    | 1.013        |
| W          | 1.08            | 0.00    | $\infty$     |
| Y          | 0.36            | 0.40    | 0.916        |
| Total      | 100.00          | 100.00  |              |
| n          | 277             | 251     |              |
